# Supplementary material for: Theoretical Investigation of Geometries and Bonding of Indium Hydrides in the In2Hx and In3Hy (x = 0–4,6; y = 0–5) Series
Source: MDPI journal article supplement (doi:10.3390/molecules28010183), 2022-12-26
Supplement: s1 [file s1]

## Electronic Supplementary Information

# Theoretical Investigation of Geometries and Bonding of Indium Hydrides in the $\text{In}_2\text{H}_x$ and $\text{In}_3\text{H}_y$ ( $x = 0-4,6$ ; $y = 0-5$ ) Series

Anton S. Pozdeev<sup>1</sup>, Pavel Rublev, Steve Scheiner and Alexander I. Boldyrev \*

Department of Chemistry and Biochemistry, Utah State University, 0300 Old Main Hill,  
Logan, UT 84322-0300, USA

\* Correspondence: a.i.boldyrev@usu.edu

### Contents

|                                                                                        |          |
|----------------------------------------------------------------------------------------|----------|
| <b>Table S1.</b> Population size used for CK algorithm .....                           | 2        |
| <b>Table S2.</b> Spin-states' energy difference .....                                  | 2        |
| <b>Table S3.</b> Global minimum geometries in XYZ coordinates .....                    | 2        |
| <b>Table S4.</b> Calculated NICS <sub>zz</sub> values .....                            | 6        |
| <b>AdNDP chemical bonding patterns and energy comparison of low-lying isomers.....</b> | <b>7</b> |

**Table S1.** Population size used for CK algorithm of  $\text{In}_2\text{H}_x$  and  $\text{In}_3\text{H}_y$  ( $x = 0-4,6$ ;  $y = 0-5$ ) stoichiometries.

| Stoichiometry                      | Population Size |
|------------------------------------|-----------------|
| $\text{In}_2\text{H}_1$            | 500             |
| $\text{In}_2\text{H}_2$            | 1000            |
| $\text{In}_2\text{H}_3$            | 1000            |
| $\text{In}_2\text{H}_4$            | 1500            |
| $\text{In}_2\text{H}_6$            | 1500            |
| $\text{In}_3$                      | 200             |
| $\text{In}_3\text{H}_1^{\text{S}}$ | 750             |
| $\text{In}_3\text{H}_1^{\text{T}}$ | 750             |
| $\text{In}_3\text{H}_2$            | 1000            |
| $\text{In}_3\text{H}_3$            | 1000            |
| $\text{In}_3\text{H}_4$            | 1500            |
| $\text{In}_3\text{H}_5$            | 3000            |

Final energies were calculated using QRO-CCSD(T)/cc-pVTZ level for the geometries obtained at U-TPSSH/def2-TZVPP level with Zero-Point energy corrections (ZPE). This calculation scheme is denoted as “QRO-CCSD(T)/cc-pVTZ(-PP) // U-TPSSH/def2-TZVPP”.

**Table S2.** Spin-states' energy difference calculated at QRO-CCSD(T)/cc-pVTZ(-PP) // U-TPSSH/def2-TZVPP level of theory.

| Stoichiometries         | $E^{\text{T}} - E^{\text{S}}$ , kcal/mol | Stoichiometries         | $E^{\text{Q}} - E^{\text{D}}$ , kcal/mol |
|-------------------------|------------------------------------------|-------------------------|------------------------------------------|
| $\text{In}_2$           | -6.8                                     | $\text{In}_2\text{H}_1$ | 30.3                                     |
| $\text{In}_2\text{H}_2$ | 26.6                                     | $\text{In}_2\text{H}_3$ | 52.5                                     |
| $\text{In}_2\text{H}_4$ | 55.3                                     | $\text{In}_3$           | 6.4                                      |
| $\text{In}_3\text{H}_1$ | 1.4                                      | $\text{In}_3\text{H}_2$ | 27.0                                     |
| $\text{In}_3\text{H}_3$ | 23.2                                     | $\text{In}_3\text{H}_4$ | 43.1                                     |
| $\text{In}_3\text{H}_5$ | 36.8                                     |                         |                                          |

**Table S3.**  $\text{In}_2\text{H}_x$  and  $\text{In}_3\text{H}_y$  ( $x = 0-4,6$ ;  $y = 0-5$ ) global minimum geometries for singlet and doublet states found the lowest-lying isomers for triplet and quartet states (XYZ coordinates).

| Stoichiometry            | XYZ coordinates |              |              |              |
|--------------------------|-----------------|--------------|--------------|--------------|
| $\text{In}_2^{\text{S}}$ | 49              | -0.644338000 | 1.214273000  | 0.881291000  |
|                          | 49              | 1.634438000  | -0.263073000 | -1.201191000 |
| $\text{In}_2^{\text{T}}$ | 49              | -0.517454000 | 1.132013000  | 0.765337000  |
|                          | 49              | 1.507554000  | -0.180813000 | -1.085237000 |

|                                    |    |              |              |              |
|------------------------------------|----|--------------|--------------|--------------|
| $\text{In}_2\text{H}_1^{\text{D}}$ | 49 | -1.956105000 | 0.348048000  | 1.460731000  |
|                                    | 49 | -1.247821000 | -0.607101000 | -1.427238000 |
|                                    | 1  | -1.644175000 | -1.412847000 | 0.430307000  |
| $\text{In}_2\text{H}_1^{\text{Q}}$ | 49 | 0.000000000  | 0.000000000  | -1.257087000 |
|                                    | 49 | 0.000000000  | 0.000000000  | 1.370480000  |
|                                    | 1  | 0.000000000  | 0.000000000  | 3.089901000  |
| $\text{In}_2\text{H}_2^{\text{S}}$ | 49 | 0.094537000  | -1.339387000 | -2.245354000 |
|                                    | 49 | -2.254710000 | -2.457598000 | -0.140108000 |
|                                    | 1  | -1.613239000 | -0.846706000 | -1.229059000 |
|                                    | 1  | -0.546988000 | -2.950309000 | -1.156479000 |
| $\text{In}_2\text{H}_2^{\text{T}}$ | 49 | -1.311816000 | -0.964966000 | -1.240729000 |
|                                    | 49 | 1.055717000  | -0.022761000 | -0.019842000 |
|                                    | 1  | -1.281758000 | -0.971222000 | -2.962632000 |
|                                    | 1  | -2.534943000 | -1.435050000 | -0.122496000 |
| $\text{In}_2\text{H}_3^{\text{D}}$ | 49 | 1.472252000  | -1.092080000 | 0.315474000  |
|                                    | 49 | -0.897219000 | 0.001864000  | -0.752104000 |
|                                    | 1  | 1.046641000  | 0.488827000  | -0.843242000 |
|                                    | 1  | -0.221049000 | -0.358585000 | 1.101607000  |
|                                    | 1  | 0.037274000  | -1.765726000 | -0.913436000 |
| $\text{In}_2\text{H}_3^{\text{Q}}$ | 49 | -1.418372000 | 2.906147000  | 0.420144000  |
|                                    | 49 | -0.672003000 | 0.395574000  | 2.024225000  |
|                                    | 1  | -0.497513000 | 4.238049000  | 1.108992000  |
|                                    | 1  | -2.020709000 | -0.722556000 | 1.865870000  |
|                                    | 1  | -0.319403000 | 1.291687000  | 0.321669000  |
| $\text{In}_2\text{H}_4^{\text{S}}$ | 49 | 0.195760000  | -0.950248000 | 1.370317000  |
|                                    | 49 | 0.317625000  | 2.002374000  | 2.395903000  |
|                                    | 1  | 0.393200000  | -2.182850000 | 2.554988000  |
|                                    | 1  | -0.973741000 | 0.384486000  | 2.027872000  |
|                                    | 1  | -0.061536000 | -1.166135000 | -0.317560000 |
|                                    | 1  | 1.476692000  | 0.414473000  | 1.650579000  |
| $\text{In}_2\text{H}_4^{\text{T}}$ | 49 | -0.999408000 | 2.545170000  | -0.785135000 |

|                                             |    |              |              |              |
|---------------------------------------------|----|--------------|--------------|--------------|
|                                             | 49 | -1.925037000 | 1.469252000  | 1.751409000  |
|                                             | 1  | -2.386625000 | 1.385320000  | -0.178344000 |
|                                             | 1  | -3.084114000 | 2.485092000  | 2.488472000  |
|                                             | 1  | -0.492821000 | 2.652282000  | 1.051001000  |
|                                             | 1  | -1.174896000 | -0.019216000 | 2.126895000  |
| In <sub>2</sub> H <sub>6</sub> <sup>S</sup> | 49 | -0.285229000 | 1.228282000  | 1.191348000  |
|                                             | 49 | -2.805268000 | -0.290633000 | 1.442968000  |
|                                             | 1  | -2.085912000 | 1.224684000  | 0.464275000  |
|                                             | 1  | -1.004521000 | -0.287084000 | 2.169960000  |
|                                             | 1  | 0.754400000  | 0.612228000  | -0.013800000 |
|                                             | 1  | -2.913798000 | -1.598919000 | 0.352414000  |
|                                             | 1  | -3.844636000 | 0.325682000  | 2.648197000  |
|                                             | 1  | -0.176737000 | 2.536559000  | 2.281938000  |
| In <sub>3</sub> <sup>D</sup>                | 49 | 1.532960000  | 1.593059000  | -0.604616000 |
|                                             | 49 | -1.197470000 | 1.542509000  | -1.557796000 |
|                                             | 49 | 0.170810000  | -0.932668000 | -0.961288000 |
| In <sub>3</sub> <sup>Q</sup>                | 49 | 0.190378000  | 0.599795000  | 2.540826000  |
|                                             | 49 | -2.051165000 | 0.377932000  | -2.723139000 |
|                                             | 49 | -0.930313000 | 0.488773000  | -0.091187000 |
| In <sub>3</sub> H <sub>1</sub> <sup>S</sup> | 49 | 1.981057000  | -1.169319000 | 0.867412000  |
|                                             | 49 | -0.074052000 | 0.001206000  | -0.989637000 |
|                                             | 49 | -0.313259000 | 0.431519000  | 1.979083000  |
|                                             | 1  | -0.164845000 | -1.310207000 | 0.717442000  |
| In <sub>3</sub> H <sub>1</sub> <sup>T</sup> | 49 | -0.908968000 | -1.134072000 | -1.836342000 |
|                                             | 49 | -3.192876000 | -1.282413000 | 0.011548000  |
|                                             | 49 | 0.166240000  | 0.015264000  | 0.647652000  |
|                                             | 1  | -1.726897000 | 0.289721000  | -0.428058000 |
| In <sub>3</sub> H <sub>2</sub> <sup>D</sup> | 49 | 2.067178000  | 0.512558000  | 1.073840000  |
|                                             | 49 | -0.099640000 | 2.504441000  | 0.702810000  |
|                                             | 49 | -0.865178000 | 0.304362000  | -1.133466000 |

|                           |    |              |              |              |
|---------------------------|----|--------------|--------------|--------------|
|                           | 1  | 1.035390000  | 1.340661000  | -0.694274000 |
|                           | 1  | -0.134749000 | 0.376880000  | 0.950491000  |
| $\text{In}_3\text{H}_2^Q$ | 49 | -0.443413000 | 1.180789000  | 1.204747000  |
|                           | 49 | 2.312139000  | 2.485607000  | 1.619583000  |
|                           | 49 | 1.502198000  | 0.353646000  | -0.441427000 |
|                           | 1  | -2.042950000 | 1.232606000  | 1.865480000  |
|                           | 1  | 2.208827000  | -0.568147000 | -1.725282000 |
| $\text{In}_3\text{H}_3^S$ | 49 | -1.408015000 | 1.068443000  | -0.471232000 |
|                           | 49 | 0.533190000  | -1.859373000 | 0.090137000  |
|                           | 49 | 1.774320000  | 0.776502000  | -0.590546000 |
|                           | 1  | 0.084481000  | -0.356345000 | -1.385740000 |
|                           | 1  | 0.367652000  | 2.097817000  | -0.811678000 |
|                           | 1  | 0.212272000  | 0.147454000  | 0.801259000  |
| $\text{In}_3\text{H}_3^T$ | 49 | -2.100191000 | 1.820666000  | 0.780997000  |
|                           | 49 | -2.081756000 | 1.991848000  | -2.423555000 |
|                           | 49 | -0.349707000 | -0.271996000 | -0.946761000 |
|                           | 1  | -0.457266000 | 1.122527000  | -2.627334000 |
|                           | 1  | -2.146639000 | 3.134741000  | -0.965509000 |
|                           | 1  | -2.579743000 | 0.575014000  | -1.215038000 |
| $\text{In}_3\text{H}_4^D$ | 49 | -2.201962000 | -0.737779000 | -2.860178000 |
|                           | 49 | -0.398762000 | -2.360420000 | -0.751927000 |
|                           | 49 | 1.020091000  | -0.646209000 | -3.070683000 |
|                           | 1  | -1.933587000 | -2.624108000 | -1.686648000 |
|                           | 1  | 1.010868000  | -2.543453000 | -1.882216000 |
|                           | 1  | -0.277344000 | -2.994320000 | 0.830326000  |
|                           | 1  | -0.473304000 | -0.521512000 | -1.120075000 |
| $\text{In}_3\text{H}_4^Q$ | 49 | -1.998663000 | -1.548494000 | -3.466103000 |
|                           | 49 | -0.378127000 | -1.896165000 | -0.468959000 |
|                           | 49 | 0.731588000  | -1.504318000 | -3.690561000 |
|                           | 1  | -1.981831000 | -1.788372000 | -1.577458000 |
|                           | 1  | 1.017605000  | -1.747410000 | -1.820593000 |

|                                             |    |              |              |              |
|---------------------------------------------|----|--------------|--------------|--------------|
|                                             | 1  | -0.315011000 | -3.523084000 | 0.075767000  |
|                                             | 1  | -0.329562000 | -0.419957000 | 0.406506000  |
| In <sub>3</sub> H <sub>5</sub> <sup>S</sup> | 49 | -0.025583000 | 1.785443000  | 0.822966000  |
|                                             | 49 | -0.268775000 | -1.298836000 | -0.041061000 |
|                                             | 49 | 2.362963000  | 0.023463000  | -1.321271000 |
|                                             | 1  | 1.782173000  | 1.045122000  | 0.318682000  |
|                                             | 1  | -0.089865000 | 0.237267000  | -1.105625000 |
|                                             | 1  | -1.453339000 | -2.483624000 | -0.387584000 |
|                                             | 1  | -0.483504000 | -0.292188000 | 1.452563000  |
|                                             | 1  | 1.472731000  | -1.734447000 | -0.300870000 |
| In <sub>3</sub> H <sub>5</sub> <sup>T</sup> | 49 | 2.864403000  | 1.328364000  | -1.069743000 |
|                                             | 49 | 1.984278000  | 0.729183000  | 1.912374000  |
|                                             | 49 | -0.209407000 | 0.277754000  | -0.185289000 |
|                                             | 1  | 1.094439000  | 0.720057000  | -1.530882000 |
|                                             | 1  | 2.973977000  | 3.079920000  | -0.985766000 |
|                                             | 1  | 0.763606000  | -0.897974000 | 0.781190000  |
|                                             | 1  | 0.046012000  | 1.584316000  | 1.050839000  |
|                                             | 1  | -1.683107000 | -0.035718000 | -0.985021000 |

**Table S4.** NICS<sub>zz</sub> values calculated at TPSSh/def2-TZVPP level of theory.

| Molecule                           | NICS <sub>zz</sub> (0), ppm | NICS <sub>zz</sub> (1), ppm | NICS <sub>zz</sub> (2), ppm | NICS <sub>zz</sub> (3), ppm |
|------------------------------------|-----------------------------|-----------------------------|-----------------------------|-----------------------------|
| <b>Benzene</b>                     | -15.199                     | -29.517                     | -17.315                     | -8.014                      |
| <b>In<sub>3</sub></b>              | -2.146                      | -17.565                     | -17.139                     | -9.760                      |
| <b>In<sub>3</sub>H<sub>1</sub></b> | +3.804                      | -12.155                     | -14.271                     | -8.235                      |

## AdNDP chemical bonding patterns and energy comparison of low-lying isomers

All bonding patterns are obtained at QRO-CCSD(T)/cc-pVTZ(-PP) // U-TPSSH/def2-TZVPP level of theory.

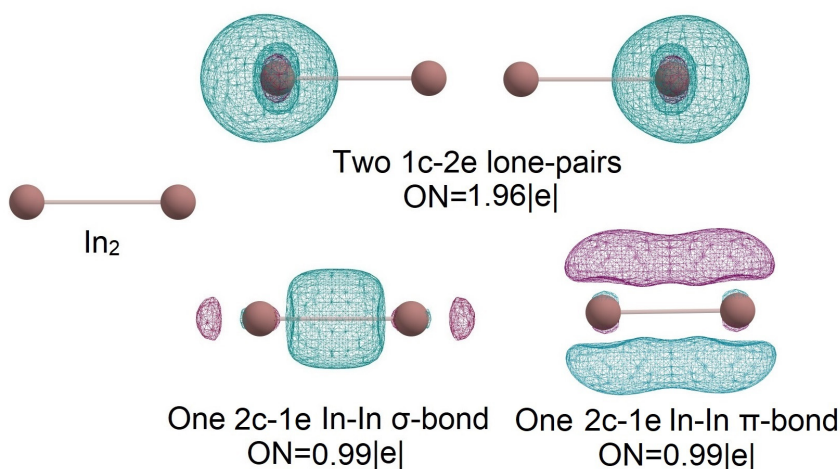

**Figure S1.** Chemical bonding pattern of GM (Global Minimum) structure of  $\text{In}_2$ .

For  $\text{In}_2\text{H}_1$ , we investigated two low-lying structures. In the case of both structures, we found lone pairs on all Indium atoms. In the GM structure, the H atom is connected to the  $\text{In}_2$  fragment via one 3c-2e  $\sigma$ -bond, whereas in ISO1 H atom is connected via classical 2c-2e  $\sigma$ -bond with one Indium atom. In both isomers, Indium atoms are connected via 2c-1e In-In bonds.

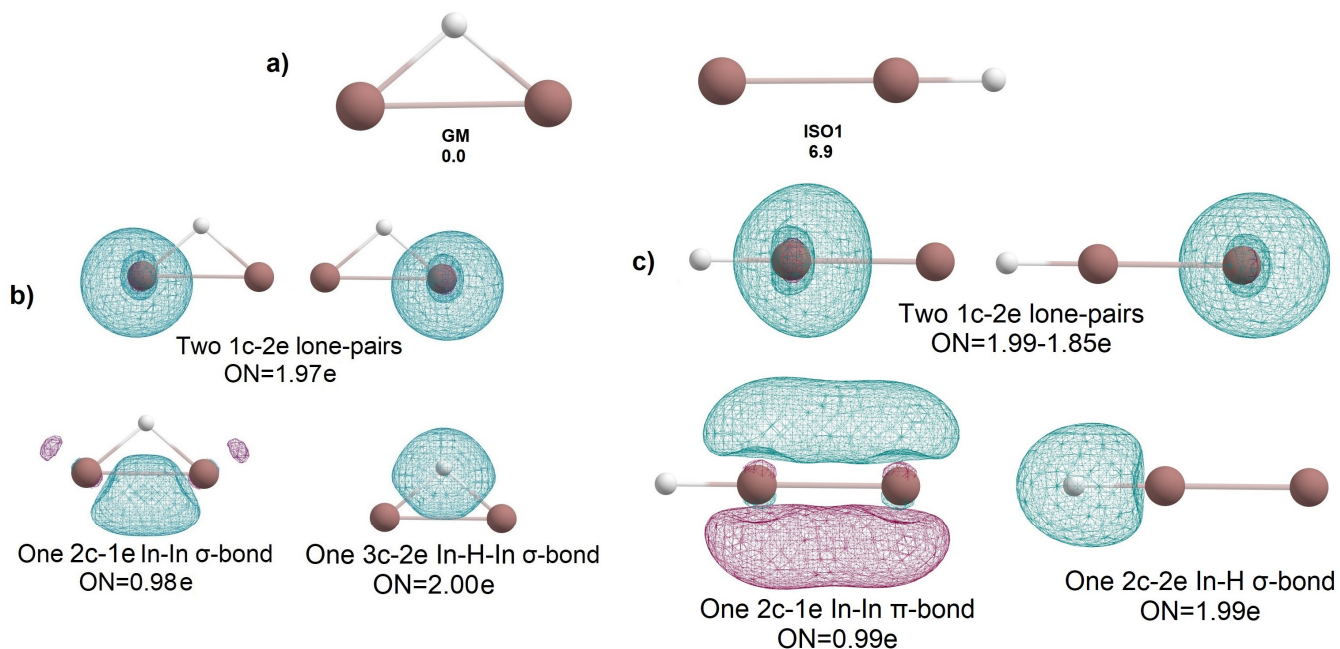

**Figure S2.** a) GM (Global Minimum) geometry and low-lying geometry of  $\text{In}_2\text{H}_1$  with corresponding relative energies, b) chemical bonding pattern of GM structure of  $\text{In}_2\text{H}_1$ , c) chemical bonding pattern of ISO1 structure of  $\text{In}_2\text{H}_1$ .

For  $\text{In}_2\text{H}_2$ , we found several isomers. The ISO1 is much higher in energy than the GM structure. Both of them have lone pairs on each Indium atom. The bonding patterns of the two isomers are very similar; the GM has two 3c-2e  $\sigma$ -bond, whereas ISO1 has one 3c-2e  $\sigma$ -bond and one classical 2c-2e In-H  $\sigma$ -bond.

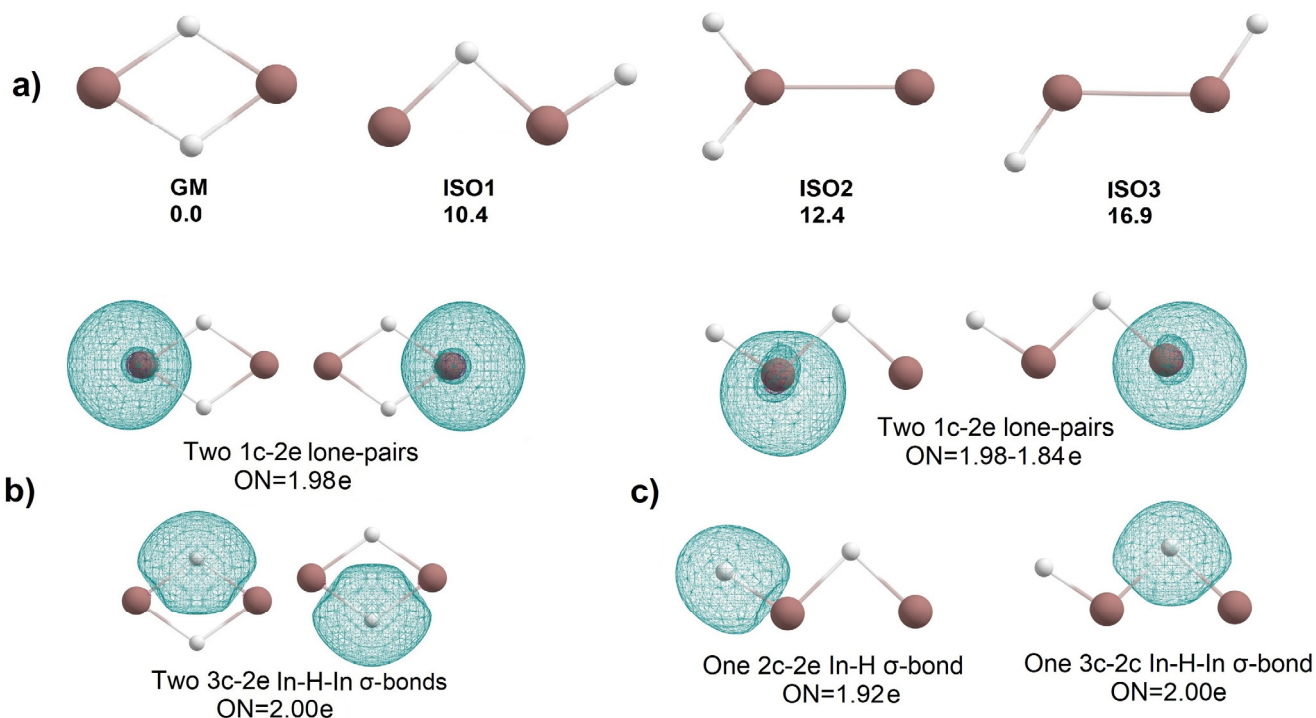

**Figure S3.** a) GM (Global Minimum) geometry and low-lying geometries of  $\text{In}_2\text{H}_2$  with corresponding relative energies, b) chemical bonding pattern of GM structure of  $\text{In}_2\text{H}_2$ , c) chemical bonding pattern of ISO1 structure of  $\text{In}_2\text{H}_2$ .

In the case of  $\text{In}_2\text{H}_3$  stoichiometry, the found low-lying isomers are relatively close in energy to the GM structure. We can see similar bonding patterns. One Indium atom has one 1c-2e lone pair, and another Indium atom has one 1c-1e unpaired electron in the case of both the GM and the ISO1 structures. The GM has three 3c-2e In-H-In  $\sigma$ -bond, the ISO1 has two 3c-2e In-H-In  $\sigma$ -bond and one classical 2c-2e In-H  $\sigma$ -bond.



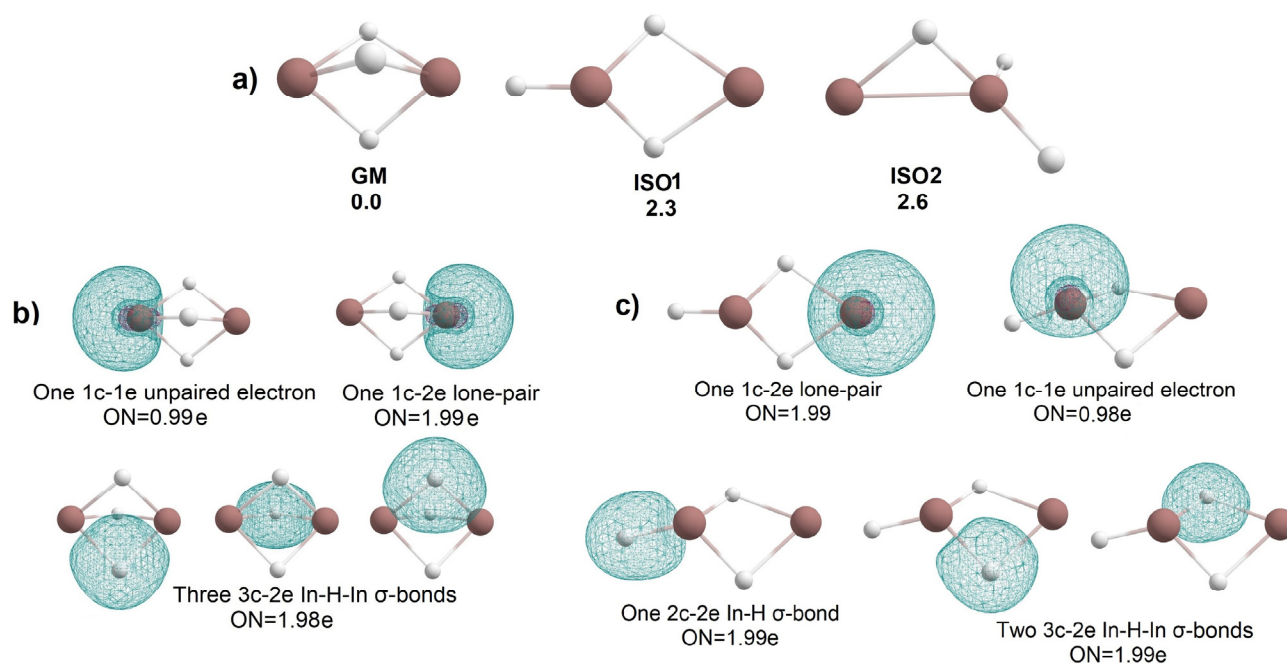

**Figure S4.** a) GM (Global Minimum) geometry and low-lying geometries of  $\text{In}_2\text{H}_3$  with corresponding relative energies, b) chemical bonding pattern of GM structure of  $\text{In}_2\text{H}_3$ , c) chemical bonding pattern of ISO1 structure of  $\text{In}_2\text{H}_3$ .

For  $\text{In}_2\text{H}_4$ , we found two very energetically close isomers; all other isomers are much higher in energy. They have the same type of bonds. For both the GM and the ISO1, we found one 1c-2e lone pair. The GM has two In-H-In 3c-2e  $\sigma$ -bonds and two In-H 2c-2e  $\sigma$ -bonds, whereas the ISO1 has three 3c-2e In-H-In  $\sigma$ -bond and one 2c-2e In-H  $\sigma$ -bond.

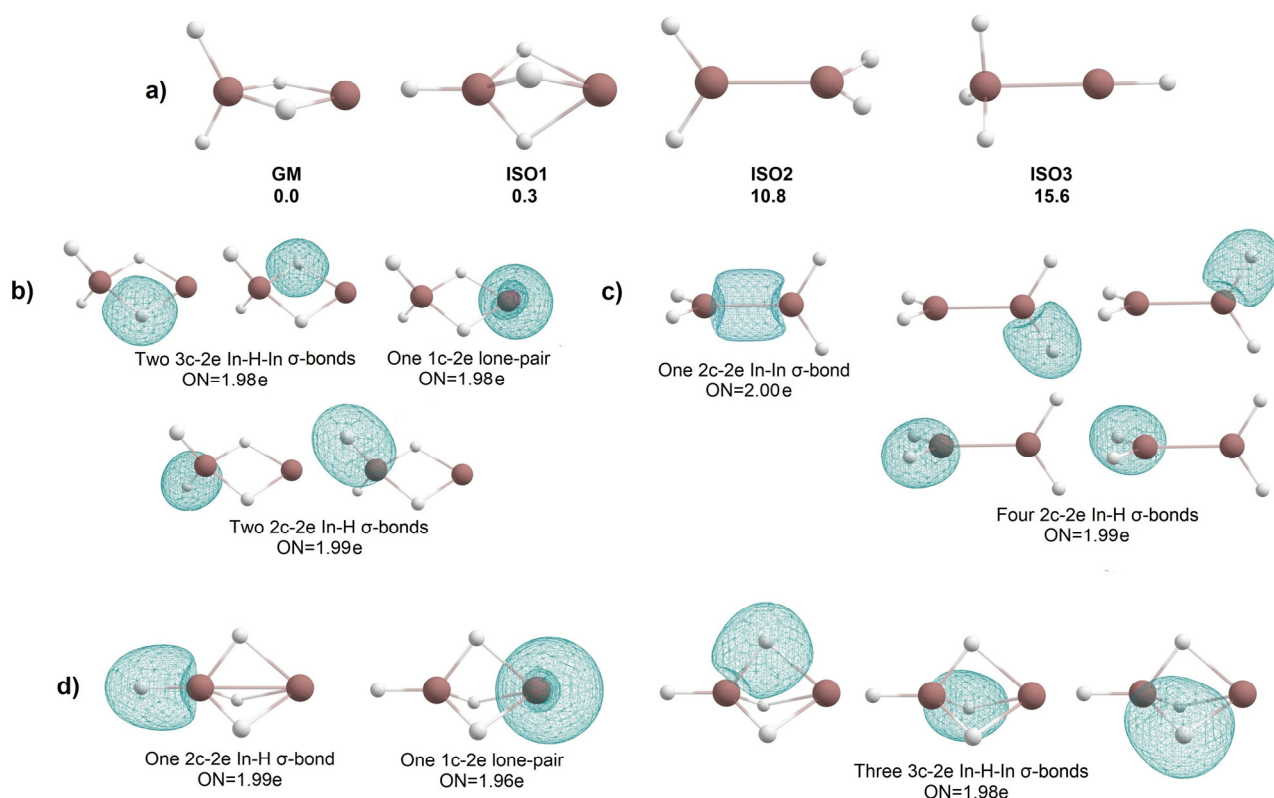

**Figure S5.** a) GM (Global Minimum) geometry and low-lying geometries of  $\text{In}_2\text{H}_4$  with corresponding relative energies, b) chemical bonding pattern of GM structure of  $\text{In}_2\text{H}_4$  (non-classical structure), c) chemical bonding pattern of classical structure of  $\text{In}_2\text{H}_4$ , d) chemical bonding pattern of ISO1 structure of  $\text{In}_2\text{H}_4$ .

For the  $\text{In}_3$  cluster, we found two low-lying isomers. The GM is a triangular aromatic cluster with three 1c-2e lone pairs, one 3c-1e In-In-In  $\sigma$ -bond, and one 3c-2e In-In-In  $\pi$ -bond. However, the ISO1 has three 1c-2e lone pairs, one 3c-2e In-In-In  $\sigma$ -bond, and one 3c-1e In-In-In  $\pi$ -bond. Thus, the bond patterns of the isomers look similar.

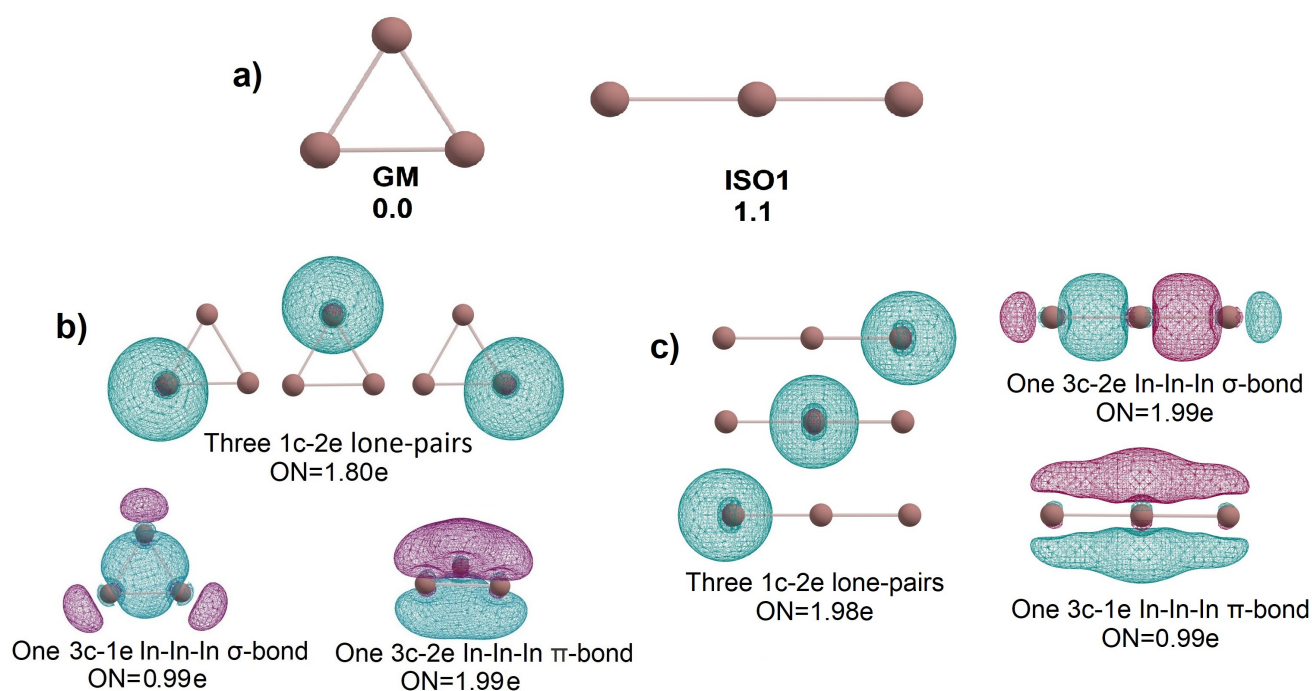

**Figure S6.** a) GM (Global Minimum) geometry and low-lying geometry of  $\text{In}_3$  with corresponding relative energies, b) chemical bonding pattern of GM structure of  $\text{In}_3$ , c) chemical bonding pattern of ISO1 structure of  $\text{In}_3$ .

CK's search for the  $\text{In}_3\text{H}_1$  stoichiometry revealed that GM and ISO1 are very close in energy, but other isomers' energies are much higher than GM's. The GM and the ISO1 are derivatives of the triangular  $\text{In}_3$  cluster; there are 1c-2e lone pairs on each Indium atom. The bonding determines the difference between the structure with the H atom. The GM has one 4c-2e In-In-In-H  $\sigma$ -bond, whereas the ISO1 has one 2c-2e In-H  $\sigma$ -bond.

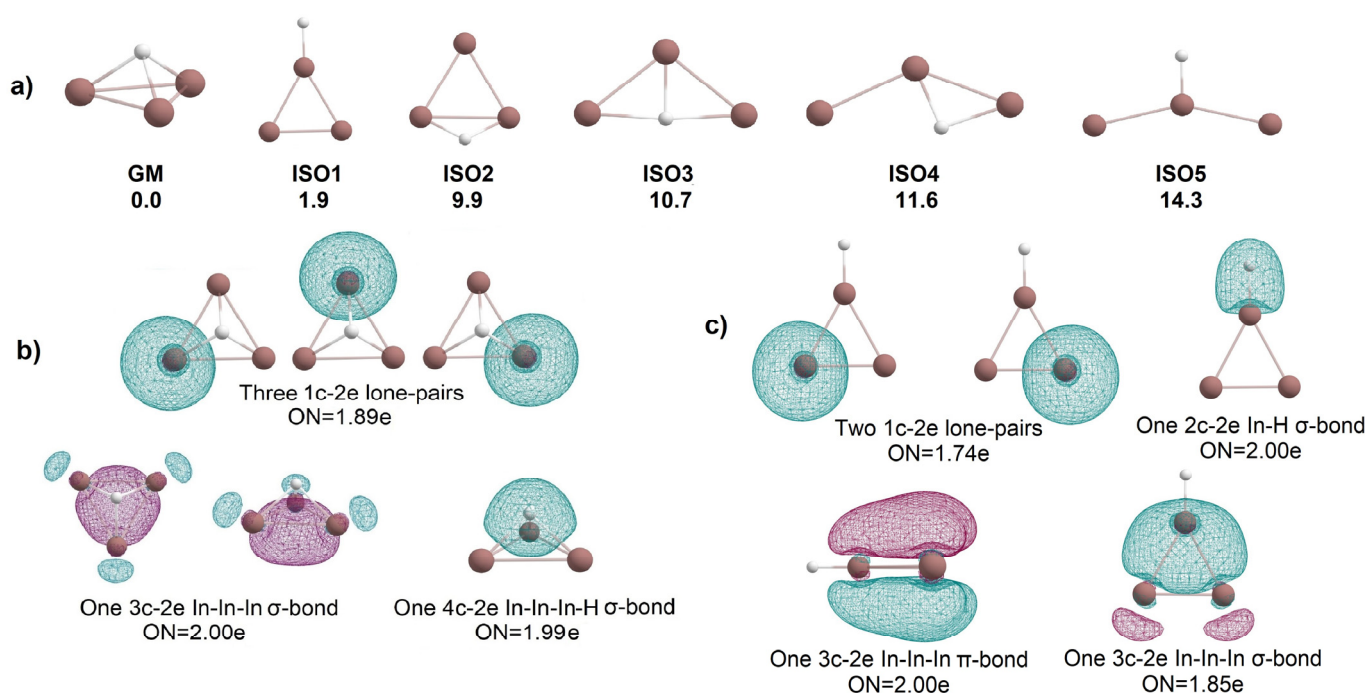

**Figure S7.** a) GM (Global Minimum) geometry and low-lying geometries of  $\text{In}_3\text{H}_1$  with corresponding relative energies, b) chemical bonding pattern of GM structure of  $\text{In}_3\text{H}_1$ , c) chemical bonding pattern of ISO1 structure of  $\text{In}_3\text{H}_1$ .

For the  $\text{In}_3\text{H}_2$  stoichiometry, we found several isomers. The GM structure has three 1c-2e lone pairs, two 4c-2e In-In-In-H  $\sigma$ -bonds, and one 3c-1e In-In-In  $\sigma$ -bond. The ISO1 also has three 1c-2e lone pairs. However, it has only one 4c-2e, one 3c-2e In-H-In  $\sigma$ -bond, and one 3c-1e In-In-In  $\sigma$ -bond. All H atoms are connected to the  $\text{In}_3$  cluster via multi-center bonds.

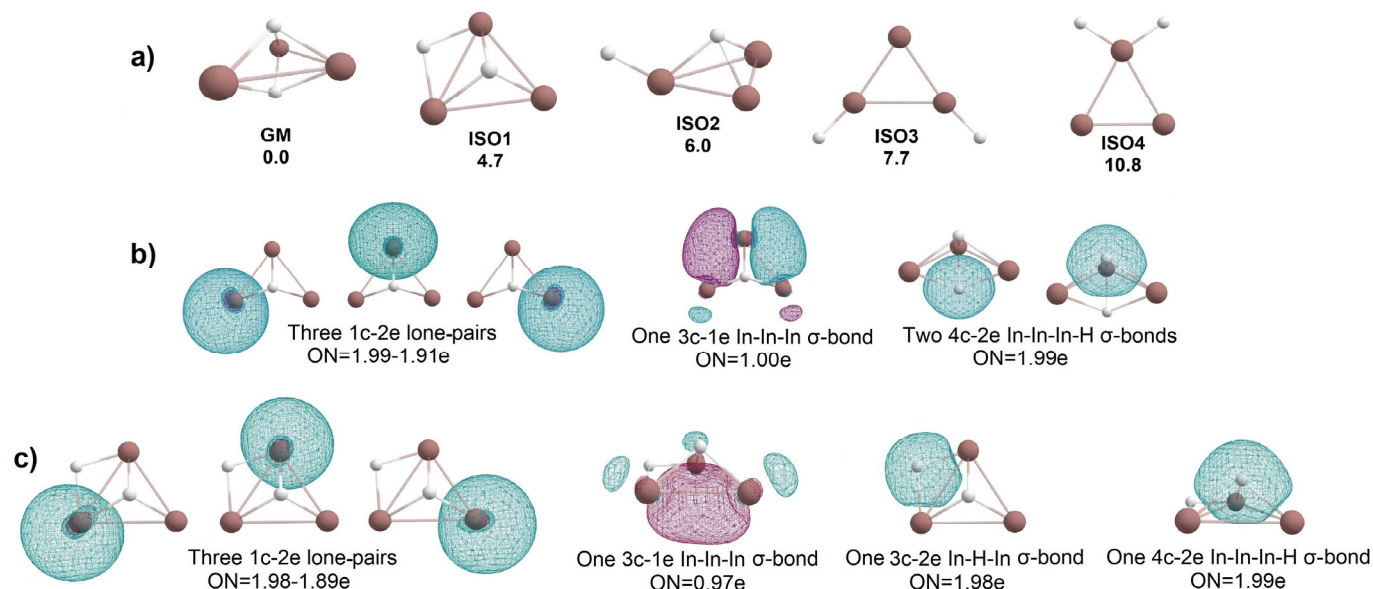

**Figure S8.** a) GM (Global Minimum) geometry and low-lying geometries of  $\text{In}_3\text{H}_2$  with corresponding relative energies, b) chemical bonding pattern of GM structure of  $\text{In}_3\text{H}_2$ , c) chemical bonding pattern of ISO1 structure of  $\text{In}_3\text{H}_2$ .

There are a lot of close energy isomers for  $\text{In}_2\text{H}_3$ . The ISO1 and the GM structures have different structures because the GM is a derivative of the triangular  $\text{In}_3$  cluster, whereas the ISO1 is a derivative

of the linear  $\text{In}_3$  cluster. The GM has three 1c-2e lone pairs, two 4c-2e In-In-In-H  $\sigma$ -bonds, and one 3c-2e In-H-In  $\sigma$ -bond. The ISO1 has two 1c-2e lone pairs, three 3c-2e In-H-In  $\sigma$ -bonds, and one 2c-2e In-In  $\sigma$ -bond.

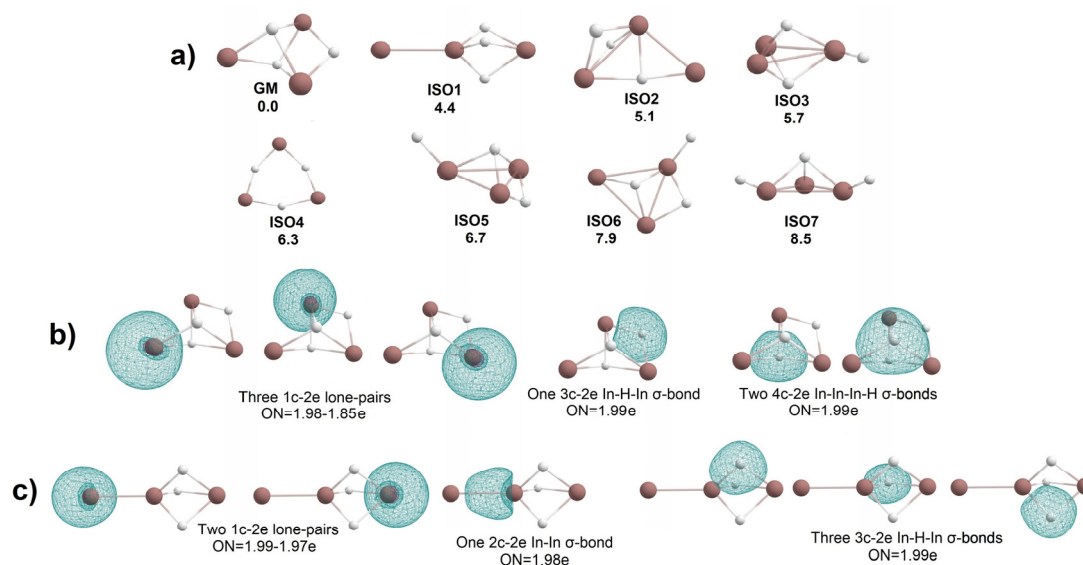

**Figure S9.** a) GM (Global Minimum) geometry and low-lying geometries of  $\text{In}_3\text{H}_3$  with corresponding relative energies, b) chemical bonding pattern of GM structure of  $\text{In}_3\text{H}_3$ , c) chemical bonding pattern of ISO1 structure of  $\text{In}_3\text{H}_3$ .

We found plenty of isomers for  $\text{In}_3\text{H}_4$  stoichiometries. Almost all of them are derivatives of the triangular  $\text{In}_3$  cluster. The GM and the ISO1 are very close in energy. They have two 1c-2e lone pairs, one 2c-2e In-H  $\sigma$ -bond, and 2c-1e In-In  $\sigma$ -bond. However, the GM has two 3c-2e In-H-In  $\sigma$ -bonds and one 4c-2e In-In-In-H  $\sigma$ -bond, whereas the ISO1 has four 3c-2e In-H-In  $\sigma$ -bonds. So, the main difference between GM and ISO1 is the presence of 4c-2e In-In-In-H  $\sigma$ -bond in the GM structure.



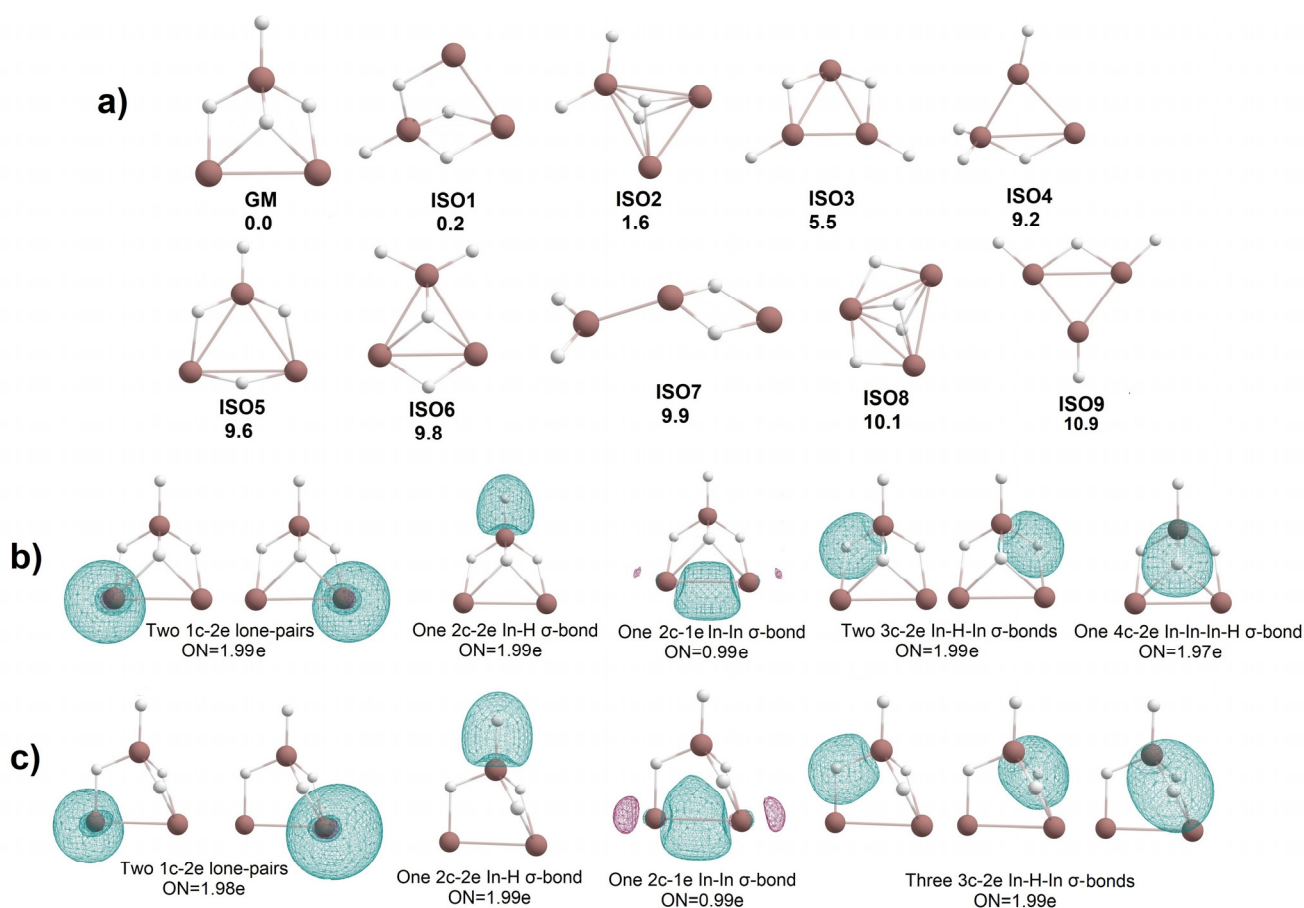

**Figure S10.** a) GM (Global Minimum) geometry and low-lying geometries of  $\text{In}_3\text{H}_4$  with corresponding relative energies, b) chemical bonding pattern of GM structure of  $\text{In}_3\text{H}_4$ , c) chemical bonding pattern of ISO1 structure of  $\text{In}_3\text{H}_4$ .

As in the case of  $\text{In}_3\text{H}_4$ , we found many isomers for  $\text{In}_3\text{H}_5$  stoichiometry. The ISO1 and the GM again are very close in energy; both of them have two 1c-2e lone pairs, one 2c-2e In-H  $\sigma$ -bond. The only difference is the 4c-2e In-In-In-H bond in the GM structure. Thus, the GM has three 3c-2e In-H-In  $\sigma$ -bonds, but the ISO1 has four 3c-2e In-H-In  $\sigma$ -bonds.

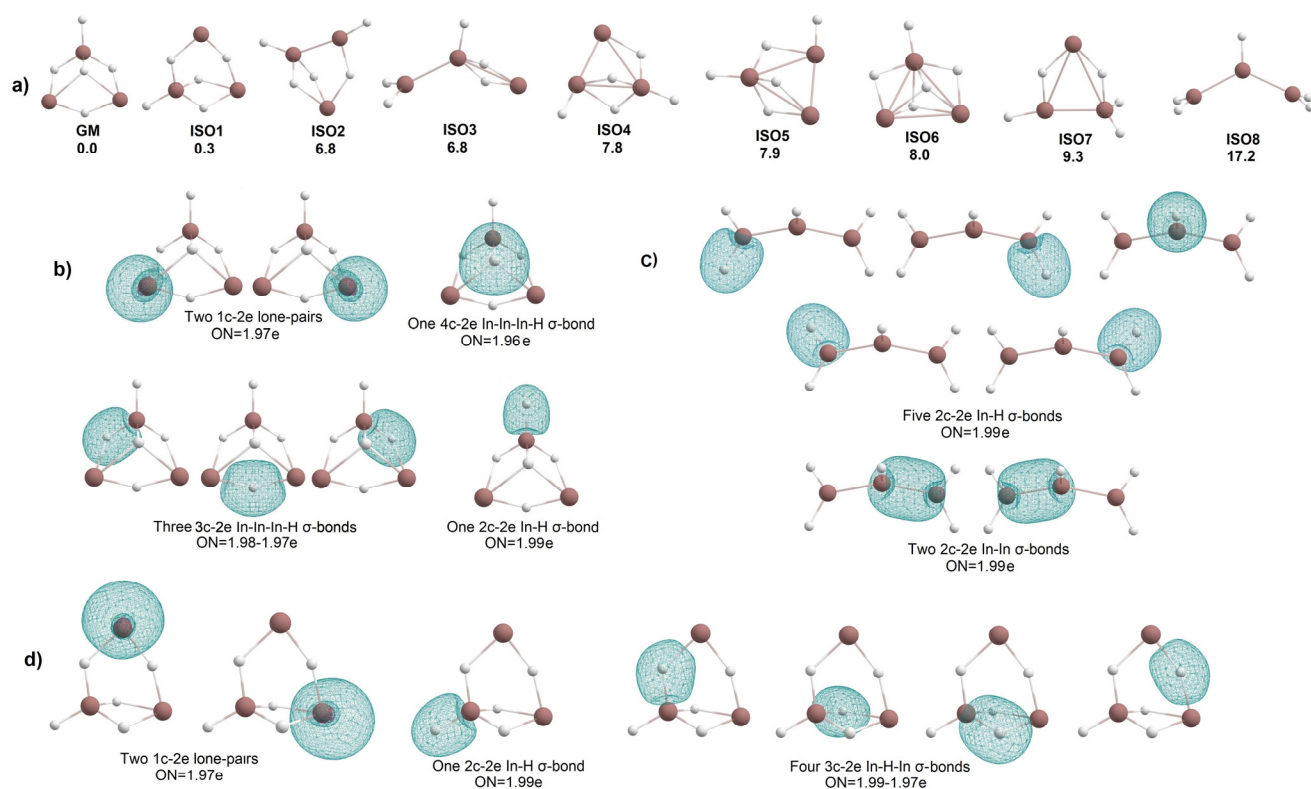

**Figure S11.** a) GM (Global Minimum) geometry and low-lying geometries of  $\text{In}_3\text{H}_5$  with corresponding relative energies, b) chemical bonding pattern of GM structure of  $\text{In}_3\text{H}_5$  (non-classical structure), c) chemical bonding pattern of classical structure of  $\text{In}_3\text{H}_5$ , d) chemical bonding pattern of ISO1 structure of  $\text{In}_3\text{H}_5$ .
